# Supplementary material for: Effect of Brewing Methods on Acrylamide Content and Antioxidant Activity Studying Eight Different Filter Coffee Preparation
Source: Preprints.org preprint supplement (doi:10.20944/preprints202309.1861.v1), 2023-09-28
Supplement: Supplementary file 1 [file supplementary]

(A)

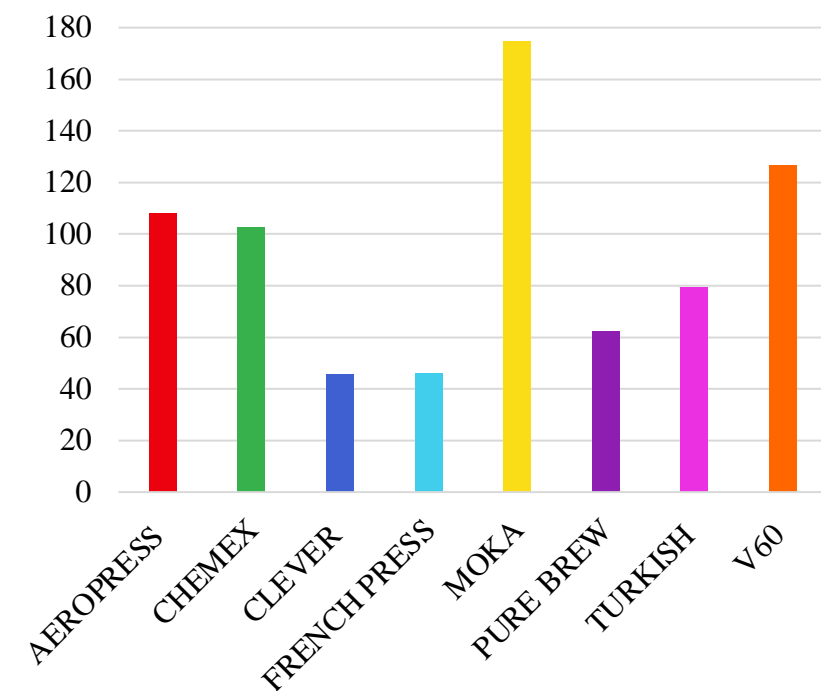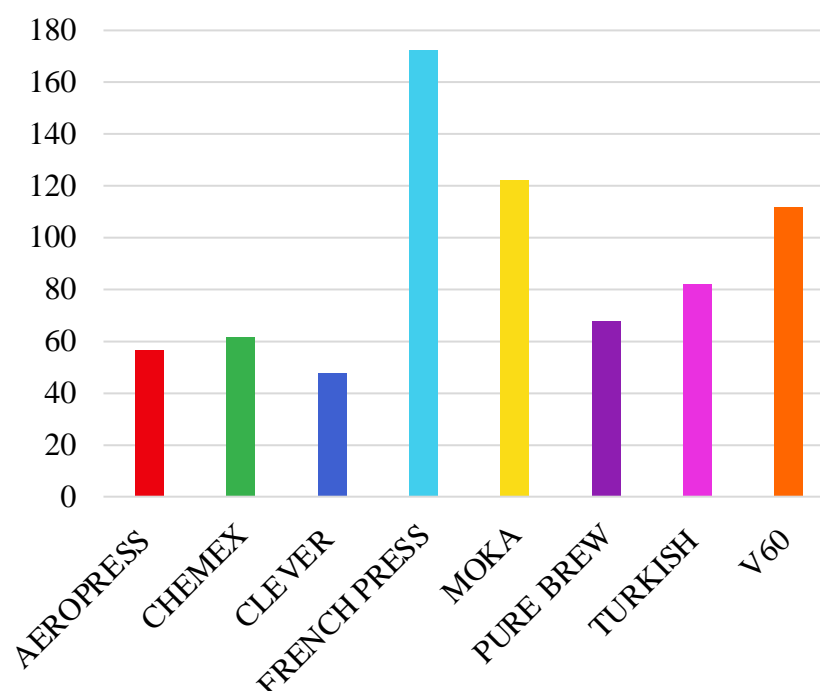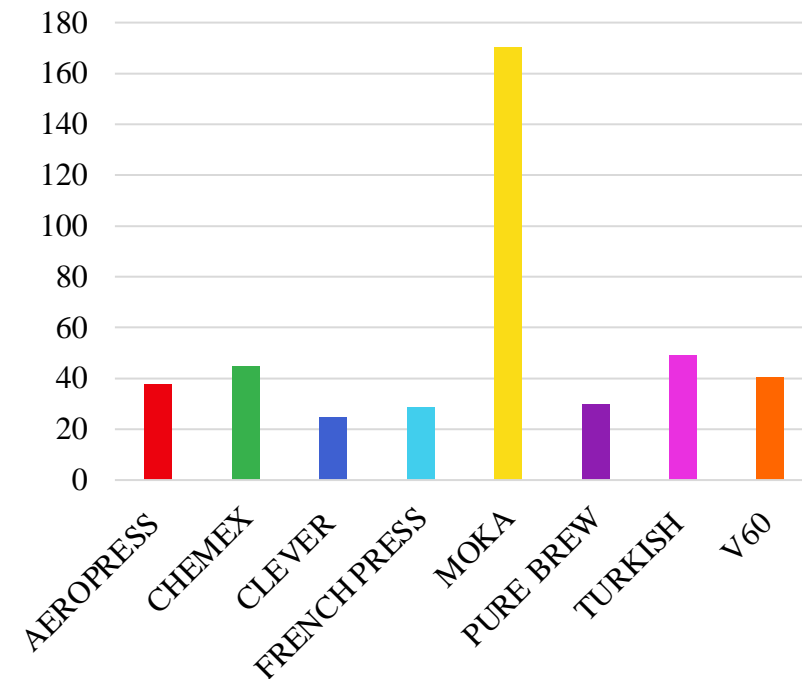

**Figure 1S** Average contents of the analysed analytes, given for eight different filter coffee extraction methods with three different coffee beans. (A) Concentration of acrylamide (ng/mL) for each coffee samples by HPLC-MS/MS. (B) Concentration of chlorogenic acids (mg/L) for each coffe samples by HPLC-DAD. (C) Concentration of caffeine (mg/L) for each coffee samples by HPLC-DAD.

**(B)**

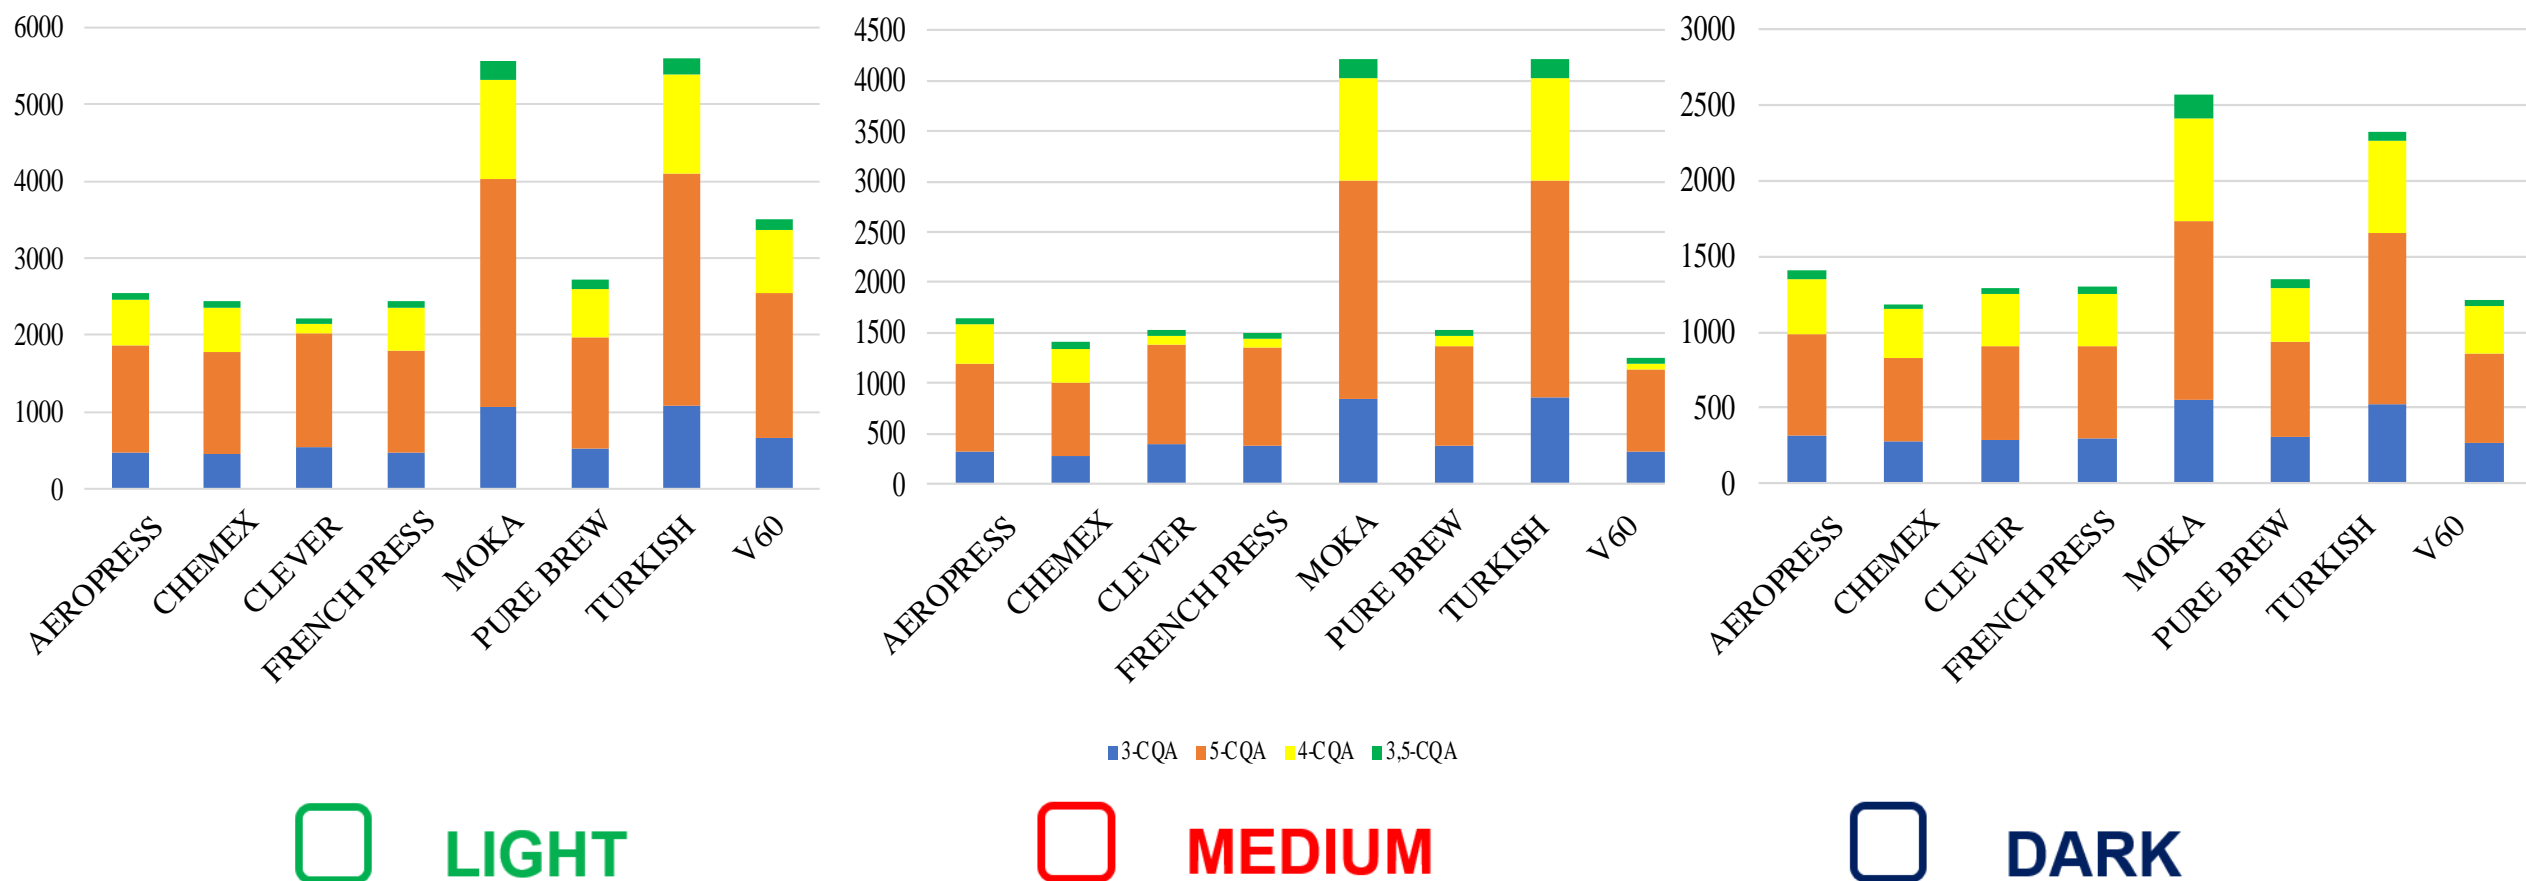

**Figure 1S** Average contents of the analysed analytes, given for eight different filter coffee extraction methods with three different coffee beans. (A) Concentration of acrylamide (ng/mL) for each coffee samples by HPLC-MS/MS. (B) Concentration of chlorogenic acids (mg/L) for each coffe samples by HPLC-DAD. (C) Concentration of caffeine (mg/L) for each coffee samples by HPLC-DAD.

(C)

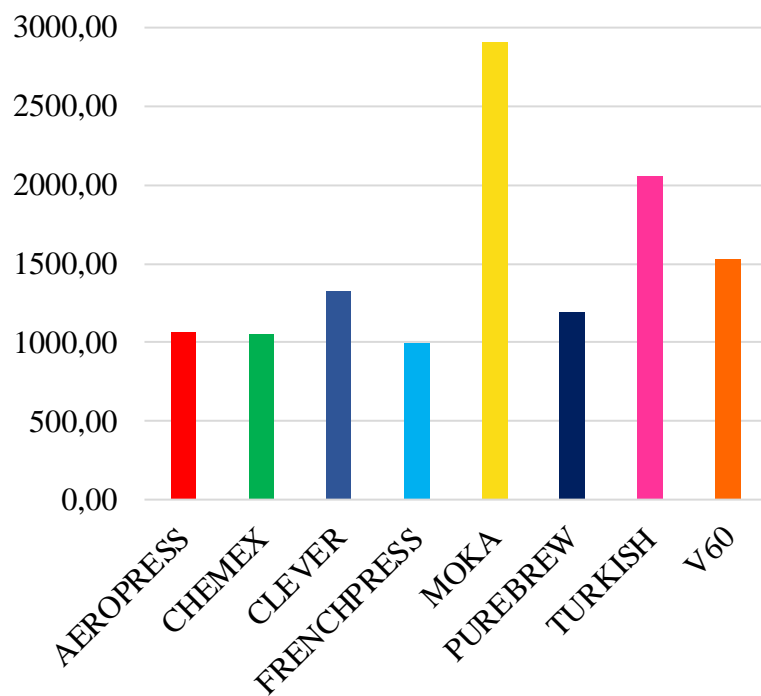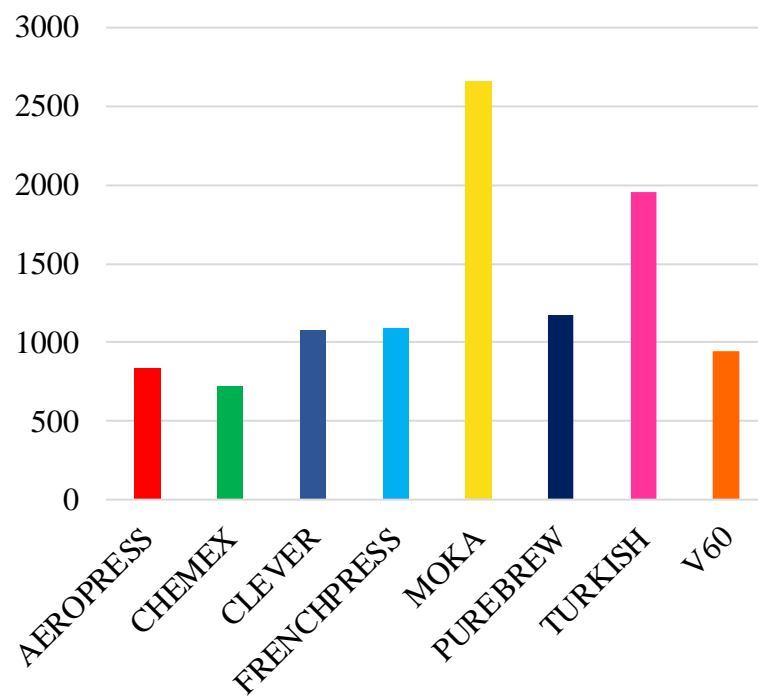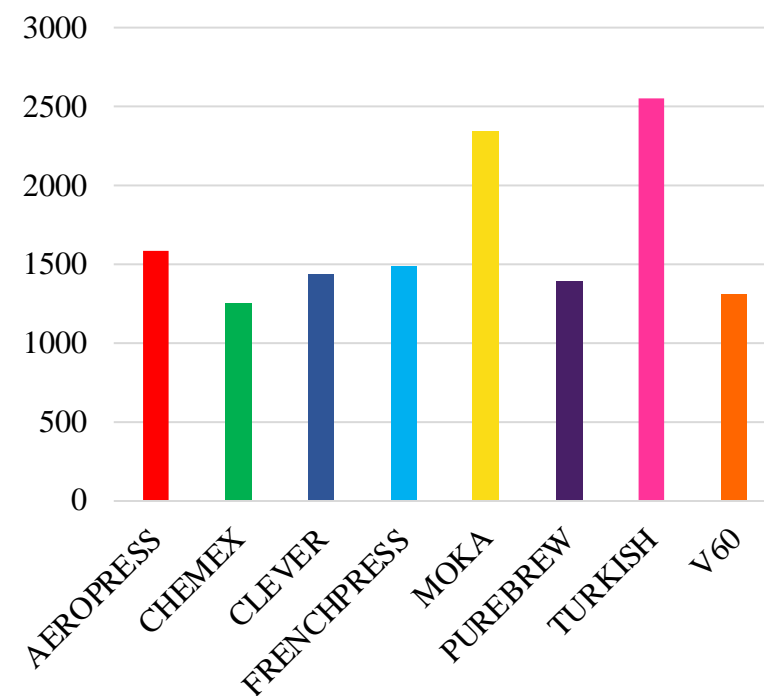

 LIGHT

 MEDIUM

 DARK

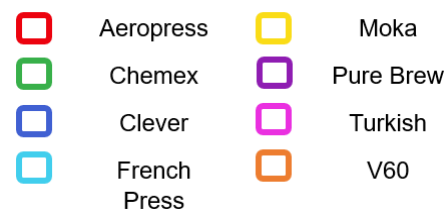

**Figure 1S** Average contents of the analysed analytes, given for eight different filter coffee extraction methods with three different coffee beans. (A) Concentration of acrylamide (ng/mL) for each coffee samples by HPLC-MS/MS. (B) Concentration of chlorogenic acids (mg/L) for each coffe samples by HPLC-DAD. (C) Concentration of caffeine (mg/L) for each coffee samples by HPLC-DAD.

**Table 1S** Particle size results (mean  $\pm$  standard deviation) obtained with Mastersizer 3000 Aero Series (Malvern PANalytical Ltd., UK).

| Sample             | Particle size ( $\mu\text{m}$ ) | Sample              | Particle size ( $\mu\text{m}$ ) | Sample            | Particle size ( $\mu\text{m}$ ) |
|--------------------|---------------------------------|---------------------|---------------------------------|-------------------|---------------------------------|
| AEROPRESS LIGHT    | 1430.32 $\pm$ 4.50              | AEROPRESS MEDIUM    | 772.65 $\pm$ 5.25               | AEROPRESS DARK    | 2140.47 $\pm$ 9.36              |
| CHEMEX LIGHT       | 2040.78 $\pm$ 3.72              | CHEMEX MEDIUM       | 2010.19 $\pm$ 6.07              | CHEMEX DARK       | 994.53 $\pm$ 4.25               |
| CLEVER LIGHT       | 776.44 $\pm$ 1.92               | CLEVER MEDIUM       | 778.31 $\pm$ 2.44               | CLEVER DARK       | 724.79 $\pm$ 4.44               |
| FRENCH PRESS LIGHT | 846.35 $\pm$ 2.41               | FRENCH PRESS MEDIUM | 831.58 $\pm$ 4.11               | FRENCH PRESS DARK | 720.47 $\pm$ 1.25               |
| MOKA LIGHT         | 629.23 $\pm$ 4.95               | MOKA MEDIUM         | 655.58 $\pm$ 1.3                | MOKA DARK         | 684.41 $\pm$ 2.17               |
| PURE BREW LIGHT    | 1050.33 $\pm$ 7.08              | PURE BREW MEDIUM    | 1330.79 $\pm$ 8.69              | PURE BREW DARK    | 1140.72 $\pm$ 5.68              |
| TURKISH LIGHT      | 261.18 $\pm$ 1.22               | TURKISH MEDIUM      | 269.31 $\pm$ 1.74               | TURKISH DARK      | 252.18 $\pm$ 0.98               |
| V60 LIGHT          | 1540.38 $\pm$ 7.51              | V60 MEDIUM          | 1660 $\pm$ 5.94                 | V60 DARK          | 1140.07 $\pm$ 6.55              |
